# Supplementary material
Source: publisher figshare collection journal article supplement (https://geolsoc.figshare.com/ndownloader/files/14229407)

# Kernel density diagrams for the Patagonian batholith

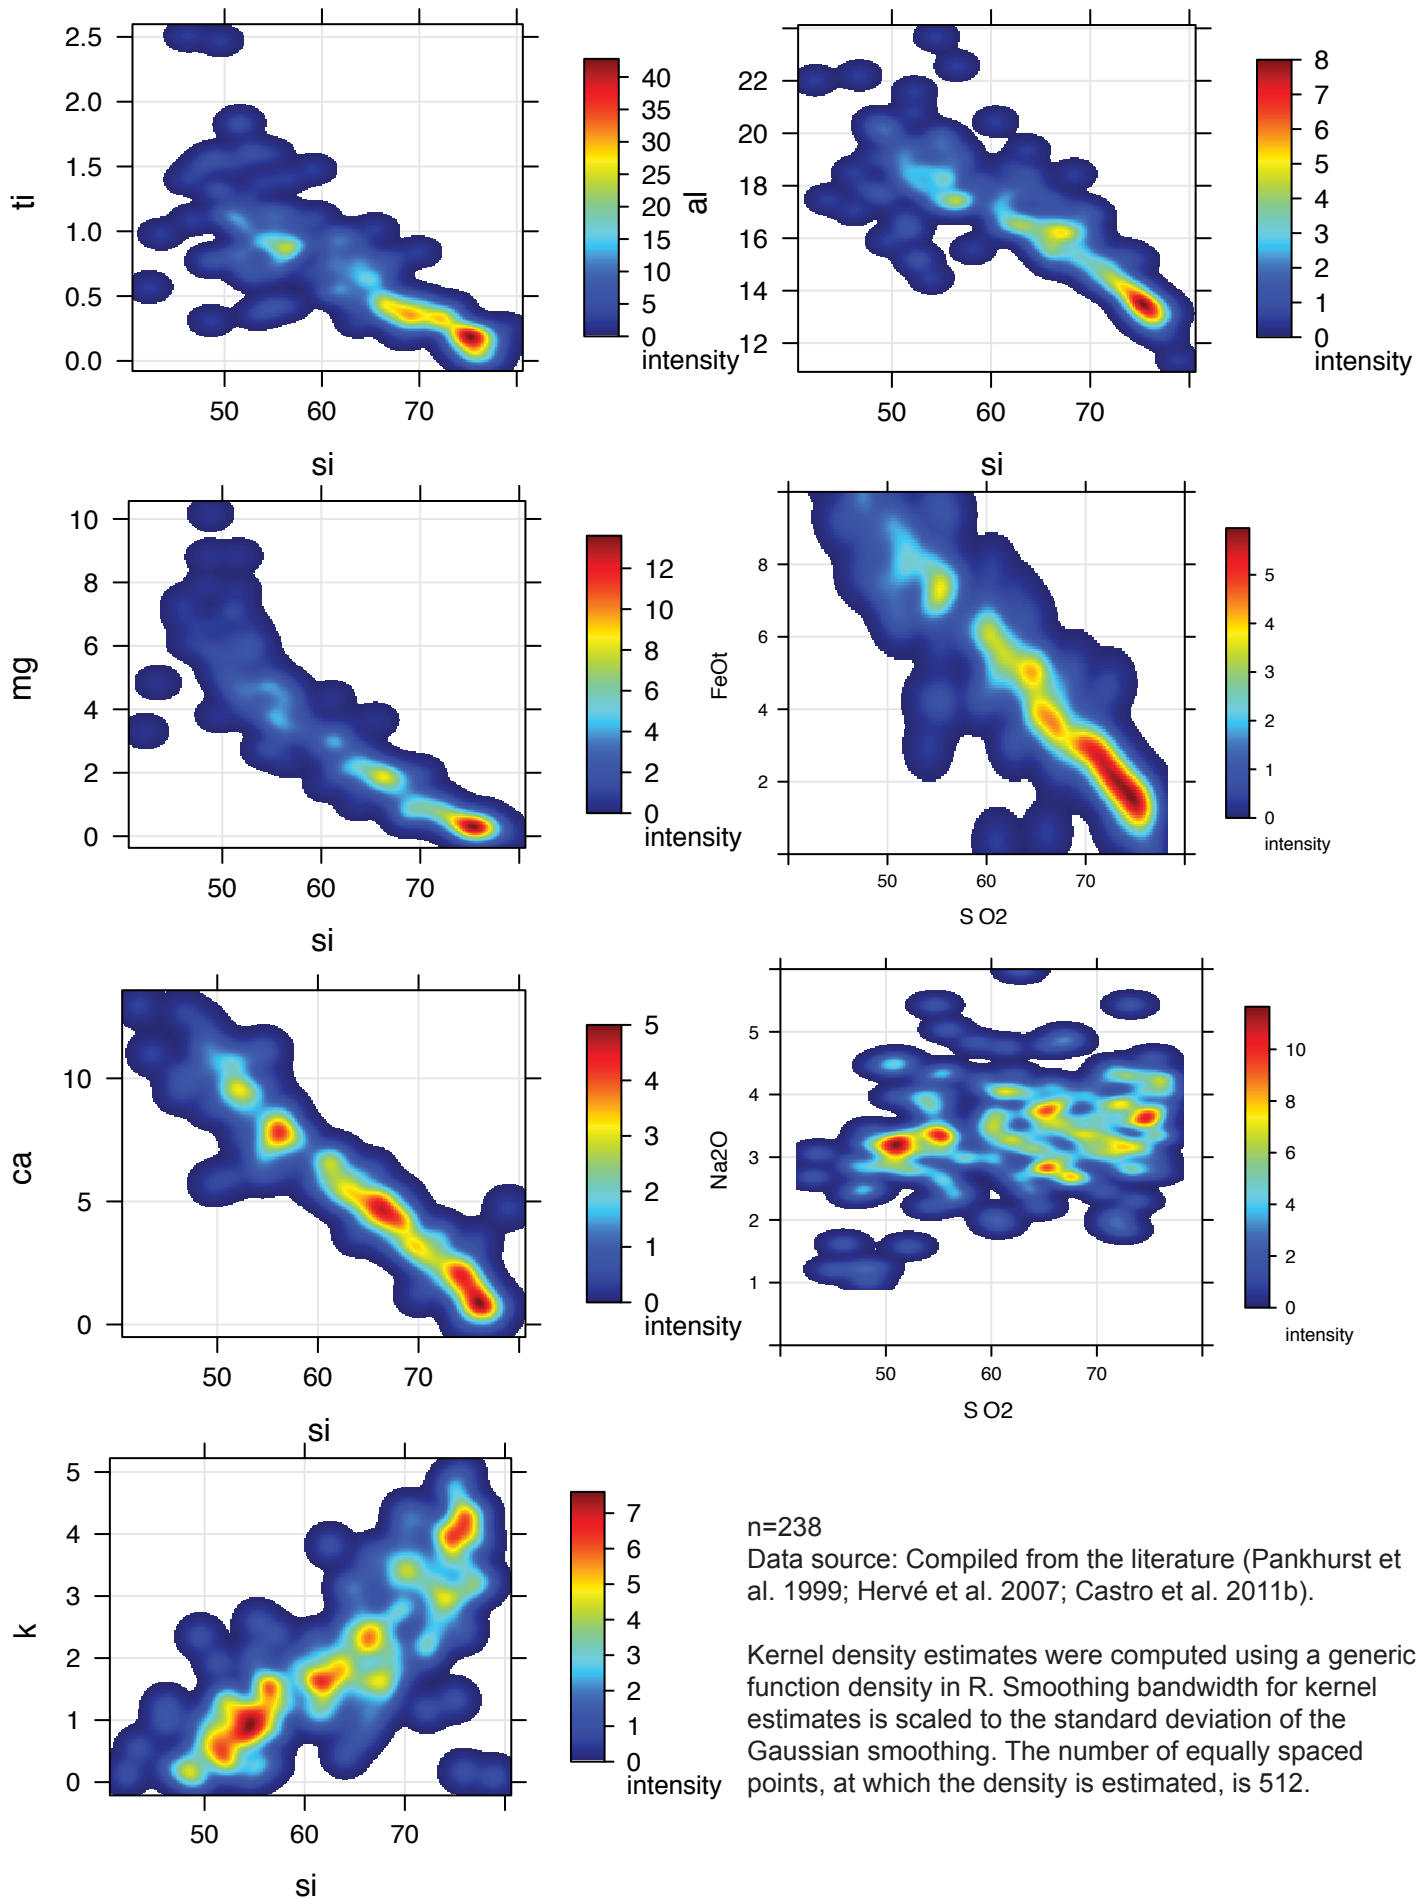

Supplement: Supplementary file 1 [file 14229407]
